# Supplementary material
Source: PubMed Central journal article supplement (PMC8678921)
Supplement: NIHMS1754093-supplement-Supplemental_figure_1.pdf [file NIHMS1754093-supplement-Supplemental_figure_1.pdf]

## **Long-Term Cardiovascular Disease Risk in Women After Hypertensive Disorders of Pregnancy: Recent Advances in Hypertension**

Kavia Khosla<sup>1</sup>, Sarah Heimberger<sup>1</sup>, Kristin M. Nieman<sup>2</sup>, Avery Tung<sup>3</sup>, Sajid Shahul<sup>3</sup>, Anne Cathrine Staff<sup>4</sup>, Sarosh Rana<sup>5,6</sup>

<sup>1</sup> University of Chicago Pritzker School of Medicine, Chicago, IL, United States

<sup>2</sup>Katalyses, Ankeny, IA

<sup>3</sup>Department of Anesthesia and Critical Care, University of Chicago, IL, USA

<sup>4</sup> Institute of Clinical Medicine, Faculty of Medicine, University of Oslo, Oslo, Norway and Division of Obstetrics and Gynaecology, Oslo University Hospital, Oslo, Norway

<sup>5</sup>Division of Maternal Fetal Medicine, Department of Obstetrics and Gynecology, University of Chicago, IL, USA

<sup>6</sup>Corresponding author:

Sarosh Rana MD, MPH, FACOG

Department of Obstetrics and Gynecology, Division of Maternal-Fetal Medicine

The University of Chicago

5841 S. Maryland Avenue, MC2050

Chicago, IL 60637

Office phone: 773-702-9866

Email: [srana@bsd.uchicago.edu](mailto:srana@bsd.uchicago.edu)

Fax: 773-702-5160

**Short title:** Postpartum cardiovascular disease

## Reference section

1. Staff AC, Redman CW, Williams D, et al. Pregnancy and Long-Term Maternal Cardiovascular Health: Progress Through Harmonization of Research Cohorts and Biobanks. *Hypertension*. 2016;67(2):251-260

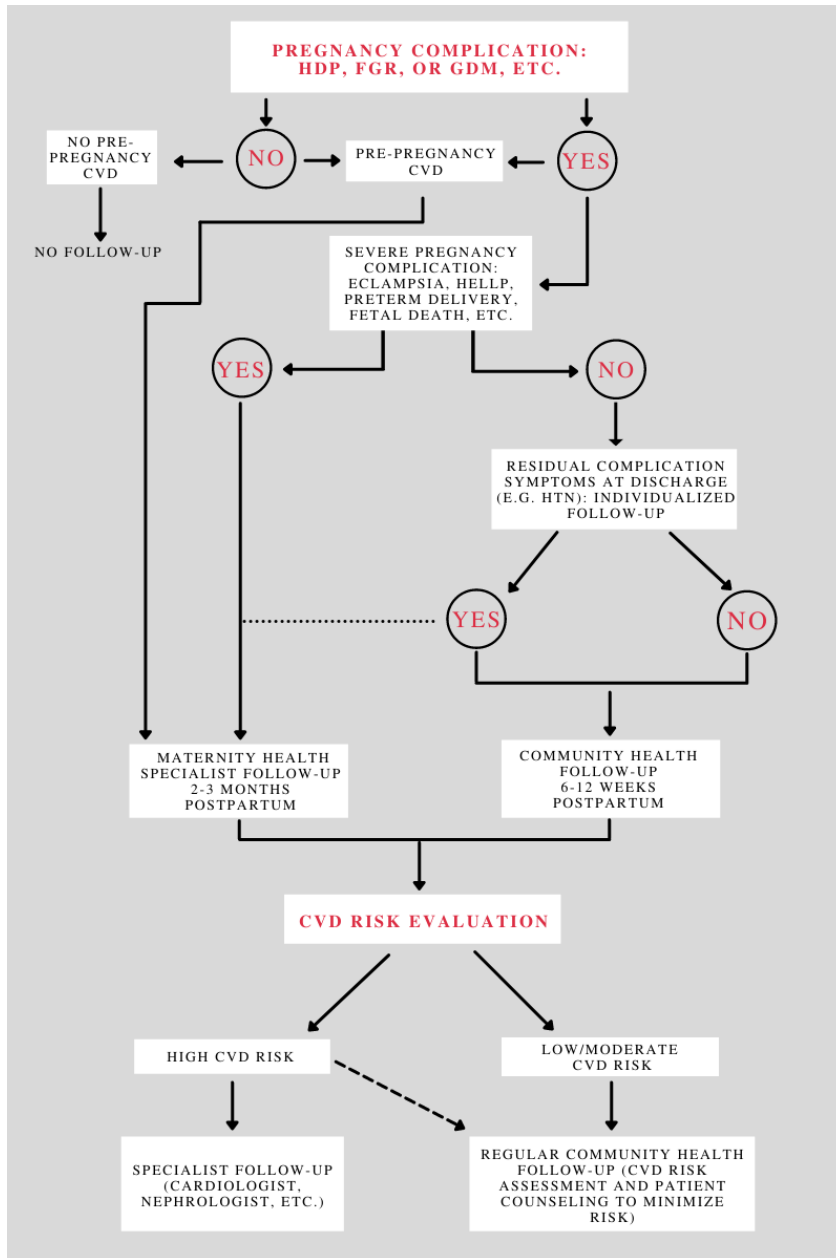

**Supplemental Figure S1: A follow-up flow chart to reduce cardiovascular disease risk following pregnancy complications.** Women with pregnancy complications, particularly HDP, should complete a follow-up within 6 weeks postpartum. In addition, specialty follow-up should occur for any woman with residual hypertension, proteinuria, or hyperglycemia at delivery discharge or affected by a severe complication. Abbreviations: CVD = cardiovascular disease, FGR = fetal growth restriction, GDM =

gestational diabetes mellitus, HDP, hypertensive disorders of pregnancy, HELLP = hemolysis, elevated liver enzymes, low platelets syndrome, HTN = hypertension (adapted from Staff et al. Hypertension 2016;67:251-260).<sup>1</sup>

# Future Research

Long-term maternal CVD risk following HDP

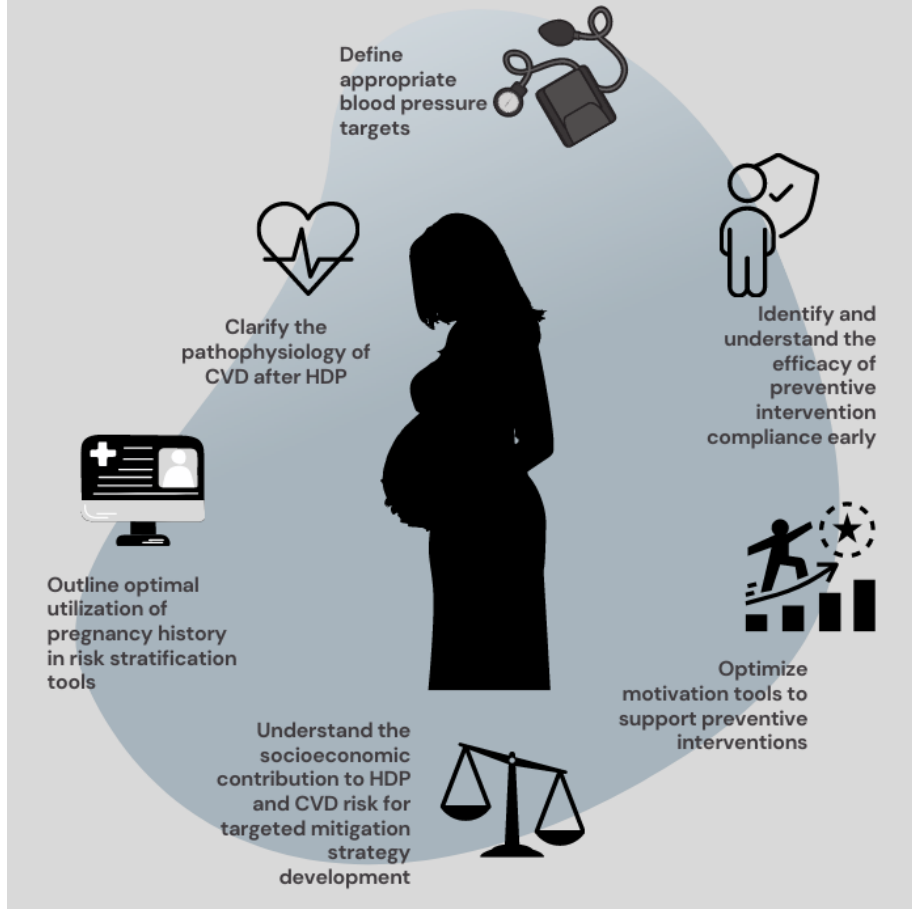

**Supplemental Figure S2: Future research directions for long-term maternal cardiovascular disease (CVD) risk management following hypertensive disorders of pregnancy.** Future research is needed to define appropriate blood pressure targets in the postpartum period, identify novel biomarkers for postpartum CVD risk, and the development, evaluation, and optimization of preventative strategies, with a particular focus on socioeconomic inequity, for postpartum CVD risk reduction. Abbreviations: CVD = cardiovascular disease; HDP = hypertensive disorders of pregnancy.
